# Supplementary material for: Integration of microseism, wavemeter buoy, HF radar and hindcast data to analyze the Mediterranean cyclone Helios
Source: Copernicus journal article supplement (doi:10.5194/os-20-1-2024), 2024-01-08
Supplement: Supplementary file 1 [file os-20-1-2024-supplement.pdf]

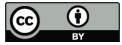

*Supplement of*

## **Integration of microseism, wavemeter buoy, HF radar and hindcast data to analyze the Mediterranean cyclone Helios**

**Alfio Marco Borzì et al.**

*Correspondence to:* Alfio Marco Borzì ([alfio.borzi@phd.unict.it](mailto:alfio.borzi@phd.unict.it))

The copyright of individual parts of the supplement might differ from the article licence.

## Supplementary figures

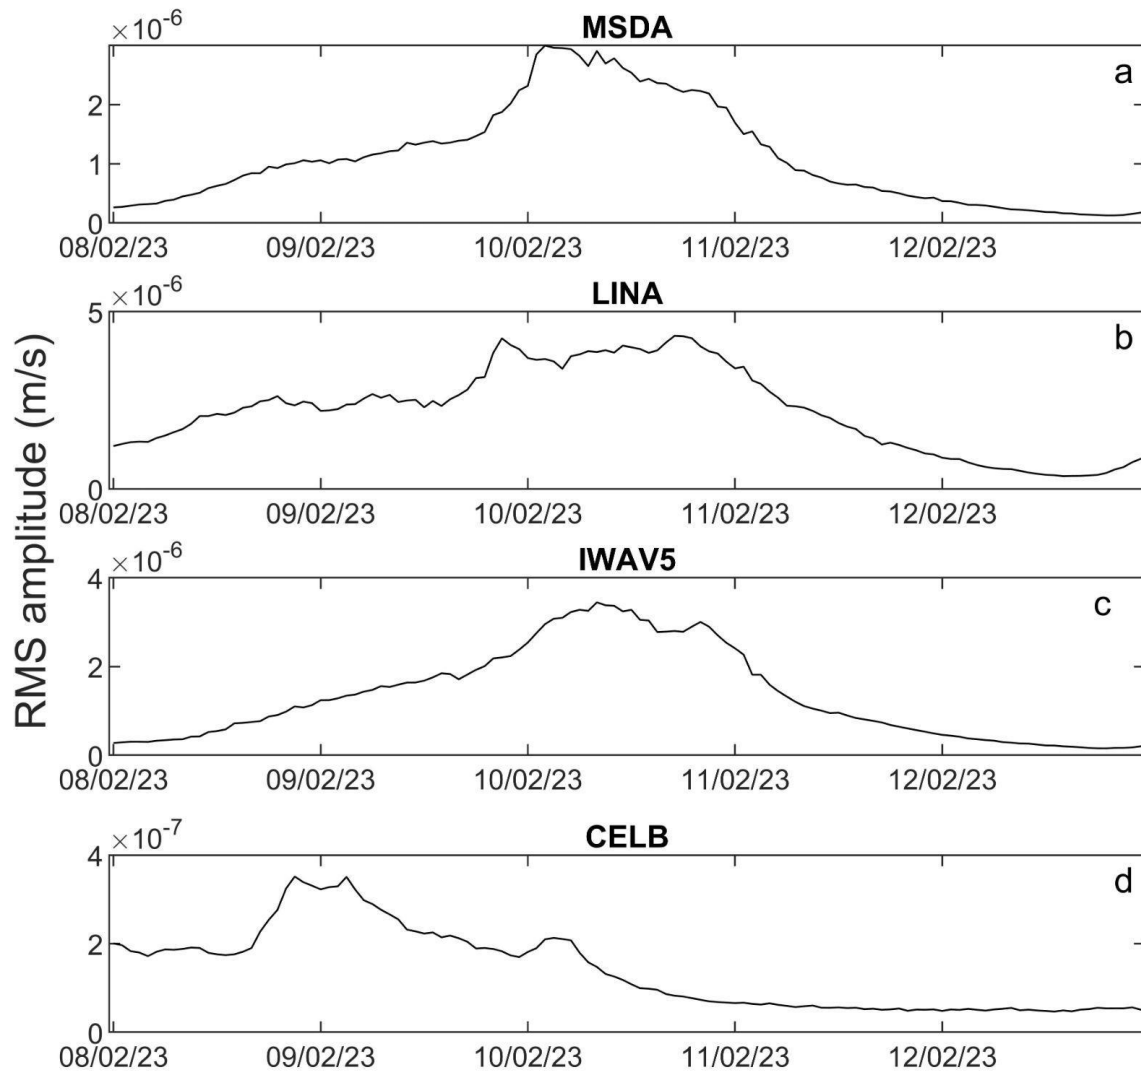

**Figure S1:** RMS amplitude time series, for the SPSM band (0.2-0.4 Hz), of the seismic signal recorded by the vertical component of 4 stations located along the Maltese coastline (a), in Linosa Island (b), in the southern part of Sicily (c) and in Central Italy (d) (see **Figure 2a** for the station locations).

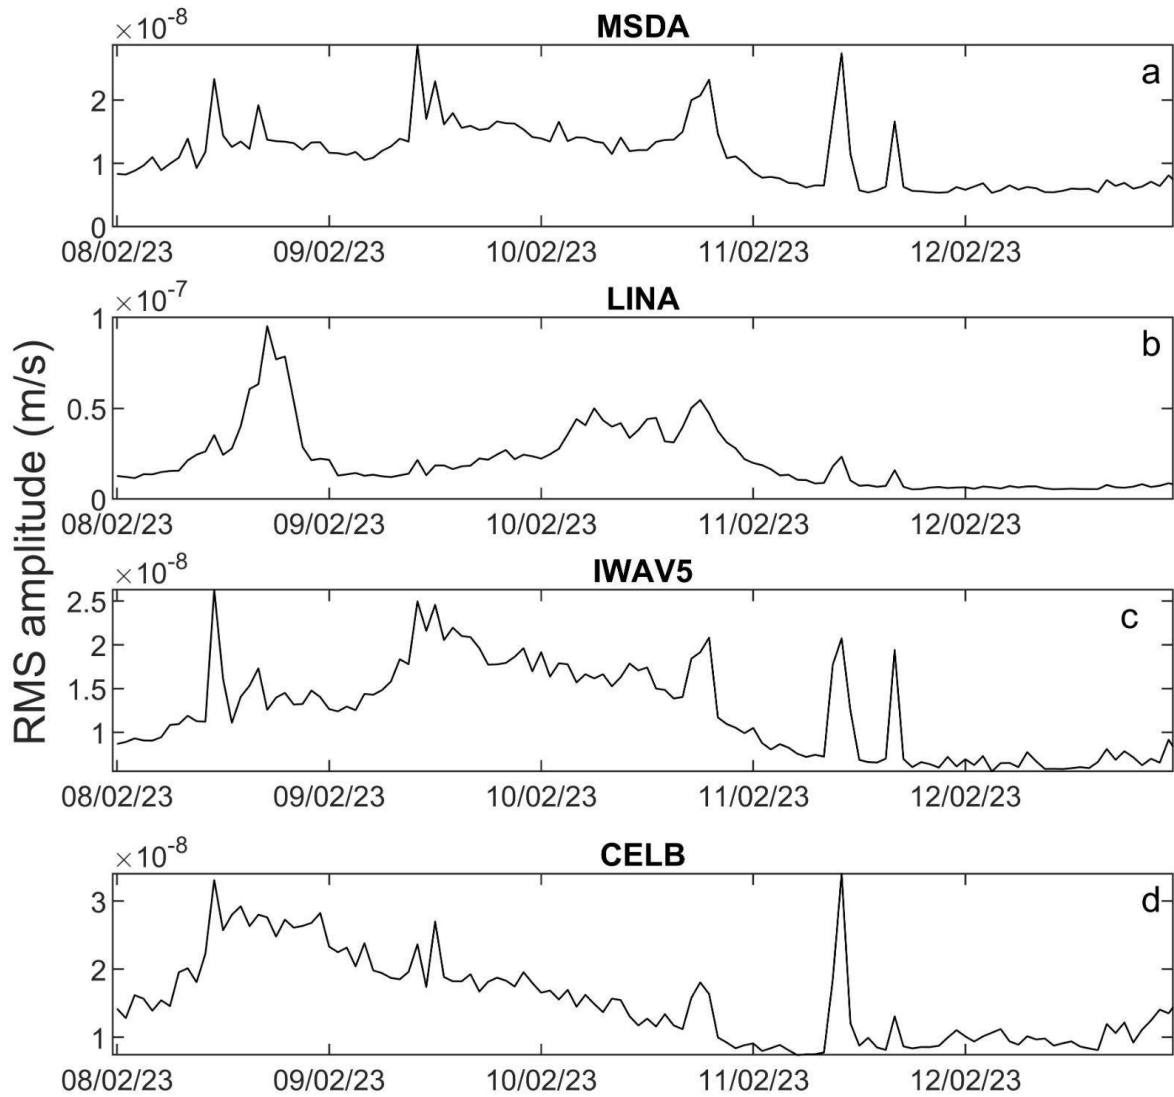

**Figure S2:** RMS amplitude time series, for the PM band (0.05-0.07 Hz), of the seismic signal recorded by the vertical component of 4 stations located along the Maltese coastline (a), in Linosa Island (b), in the southern part of Sicily (c) and in Central Italy (d) (see **Figure 2a** for the station locations).

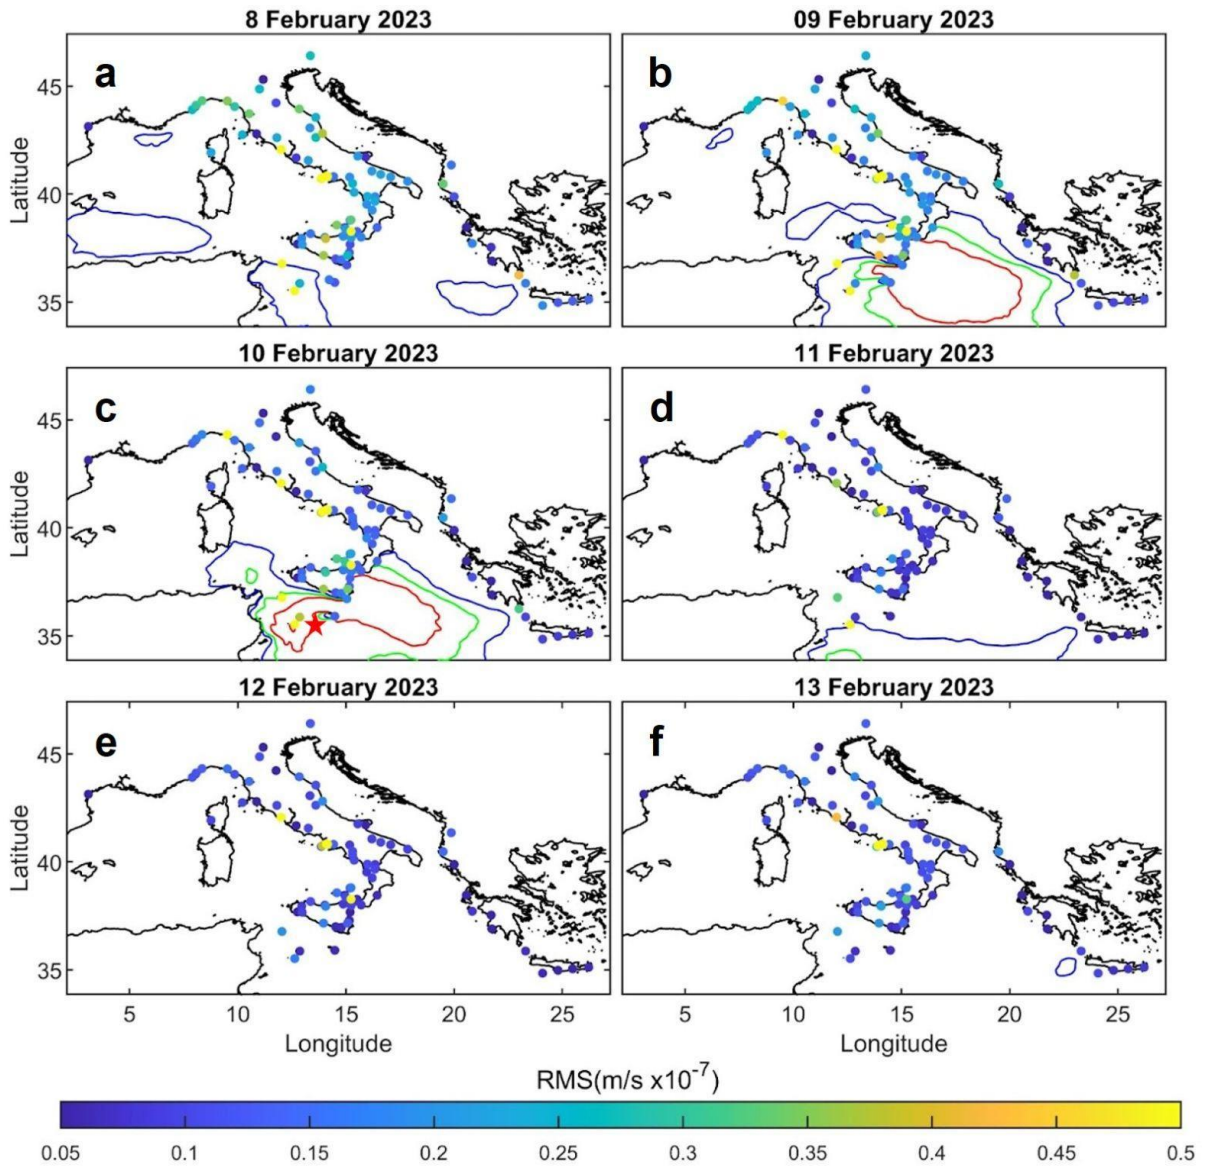

**Figure S3:** Spatial and temporal distribution of the RMS amplitude for the PM band computed at 105 stations considered (dots). The colors of dots represent the RMS amplitude as specified in the color bar. The blue, green and red contour lines represent significant wave heights of 3, 4 and 5 m, respectively, while the red five-point star in (c) indicates the eye position of the sub-tropical system Helios obtained from satellite images.

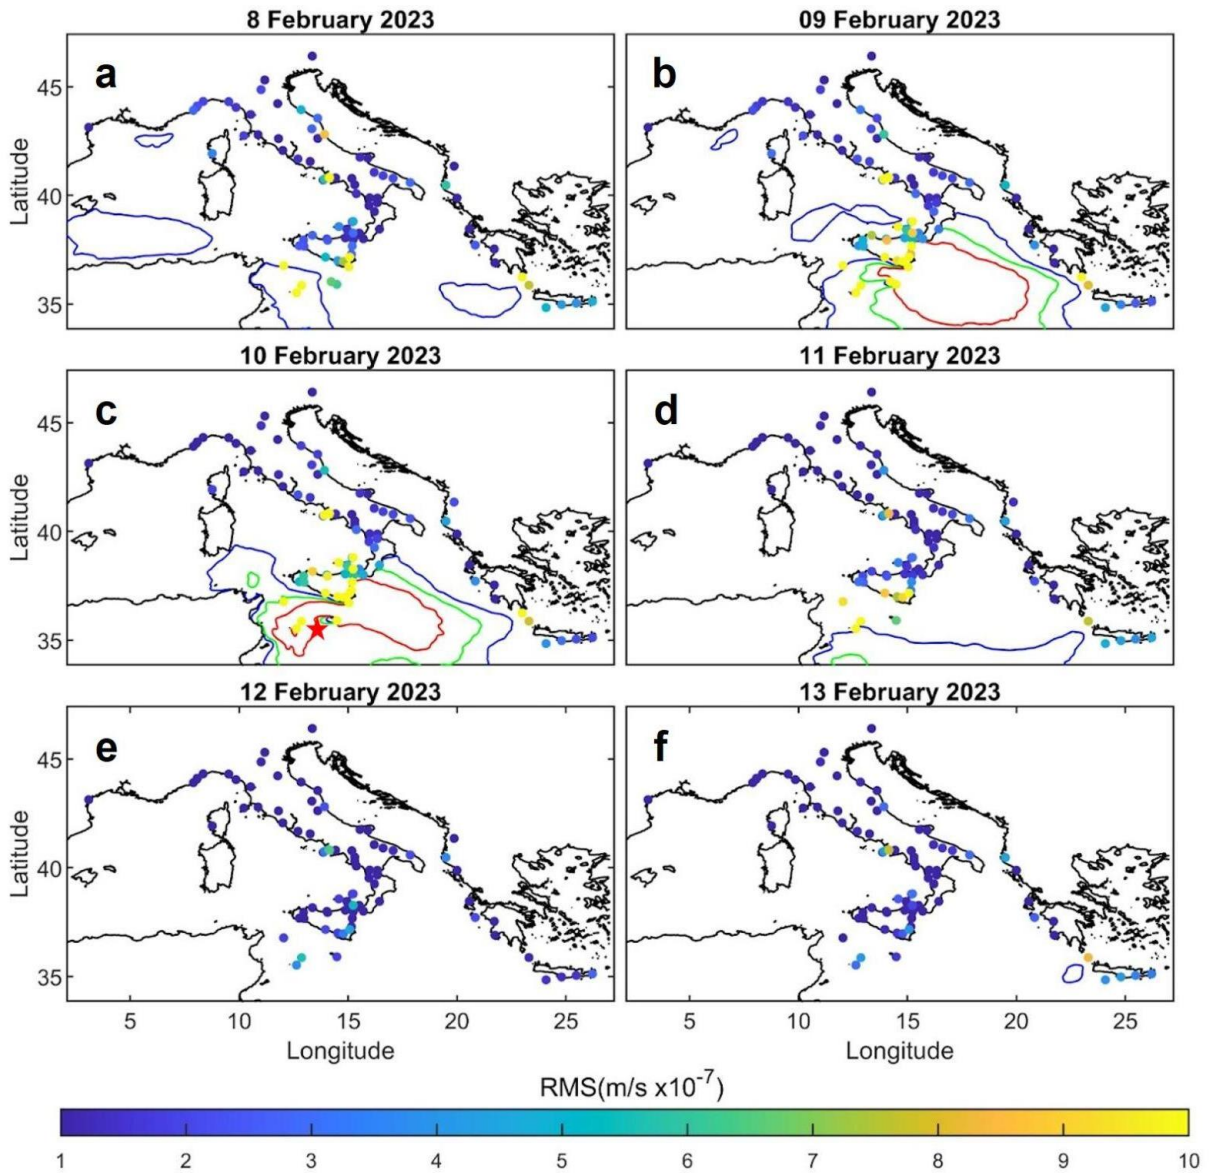

**Figure S4:** Spatial and temporal distribution of the RMS amplitude for the SPSM band computed at 105 stations considered (dots). The colors of dots represent the RMS amplitude as specified in the color bar. The blue, green and red contour lines represent significant wave heights of 3, 4 and 5 m, respectively, while the red five-point star in (c) indicates the eye position of the sub-tropical system Helios obtained from satellite images.

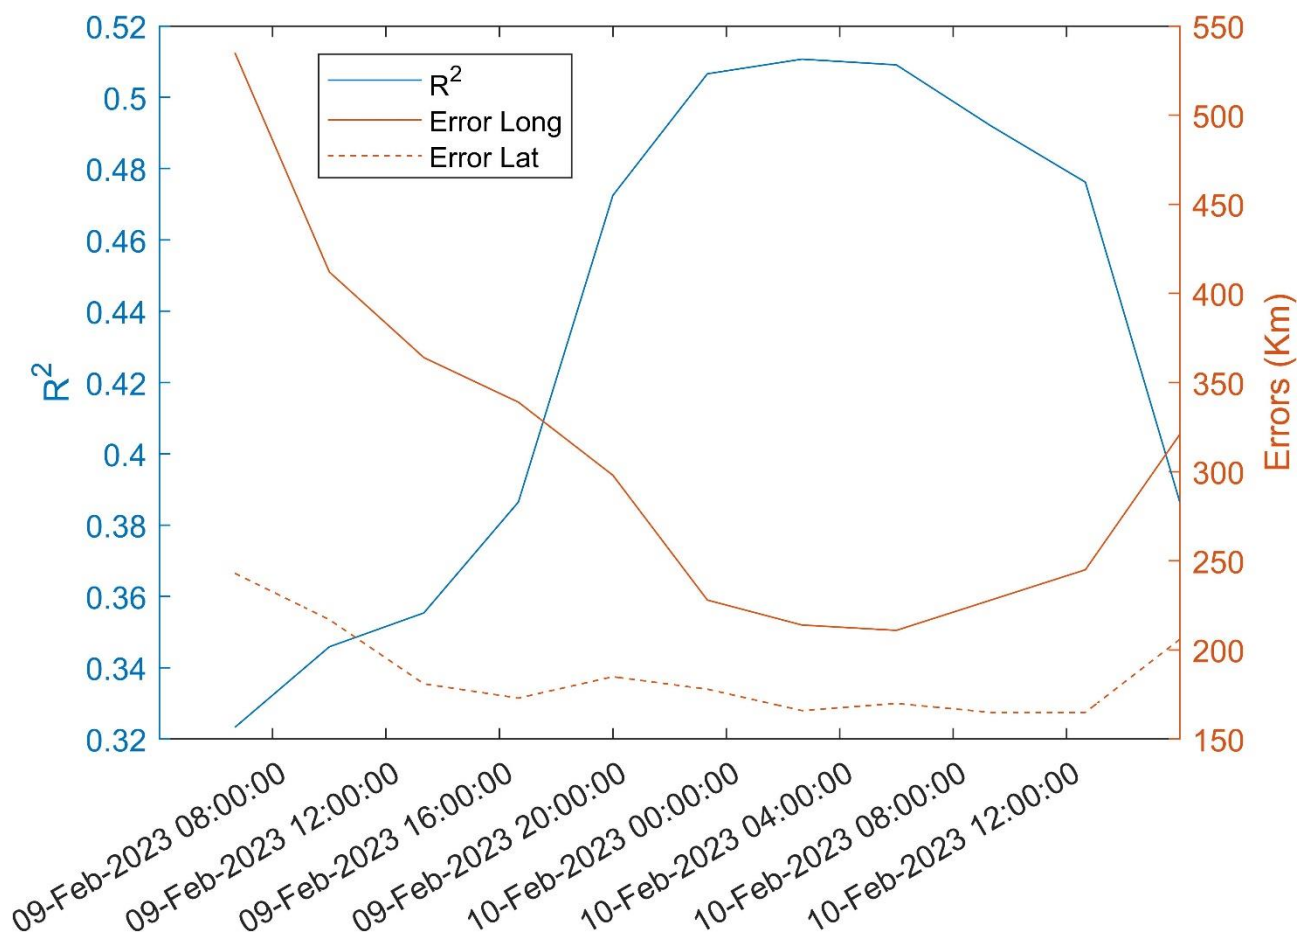

**Figure S5:** Plot showing the inversely proportional relationship between the errors (orange lines) and the  $R^2$  (blue line).

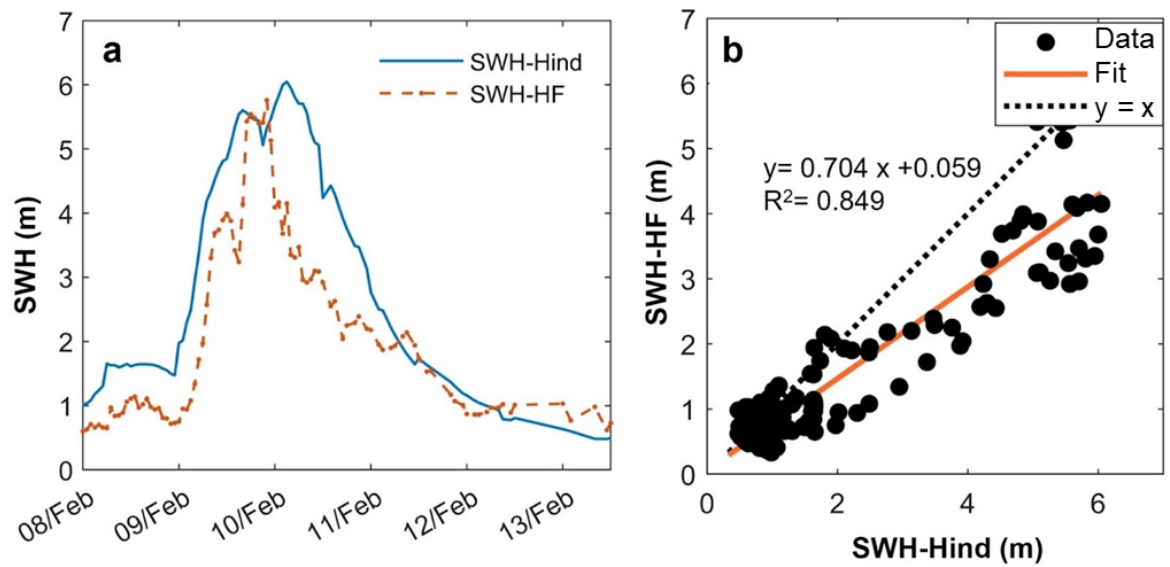

**Figure S6:** (a) Comparison between the SWH time series retrieved from hindcast data (SWH-Hind; light-blue line) and from HF Radar data (SWH-HF; orange dashed line). (b) Crossplot showing the agreement between SWH-Hind and SWH-HF data with a  $R^2$  of 0.849. For the HF Radar location see **Figure 2c**.

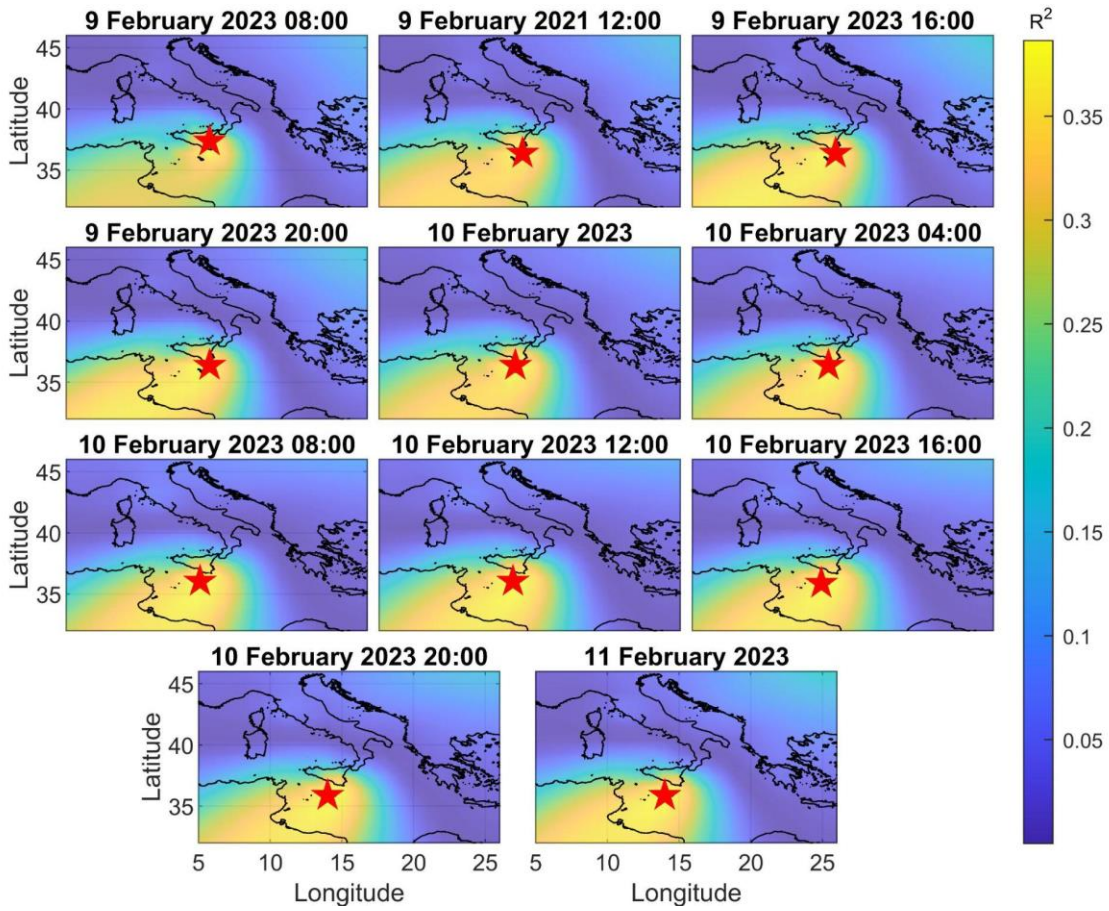

**Figure S7:** Spatial distribution of  $R^2$  values during the entire period when we obtained reliable locations. The red five-point star indicates the centroid position of all the grid nodes whose  $R^2$  values do not differ by more than 1% from the maximum  $R^2$  value.





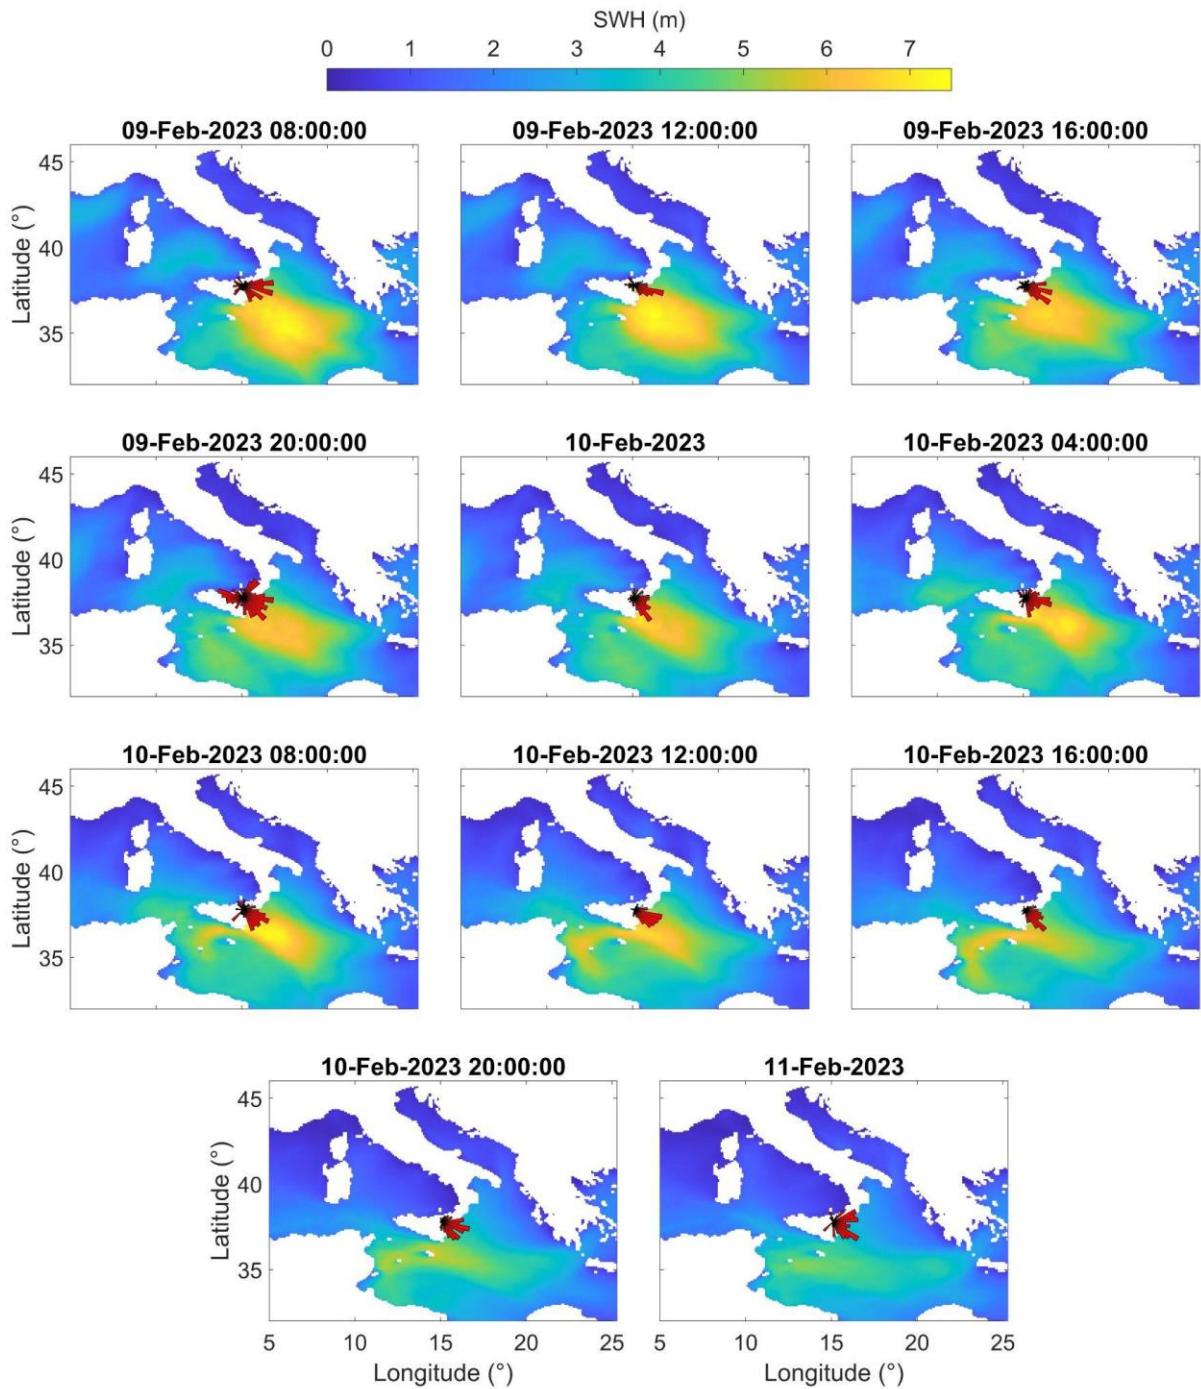

**Figure S9:** Hindcast maps showing the significant wave heights (in m) during the entire period when we obtained reliable locations by the grid search method. The rose diagram, located at the center of the Etna seismic permanent network (see **Figure 2b**), shows the distribution of the back azimuth values computed by the f–k analysis for the PM frequency band.

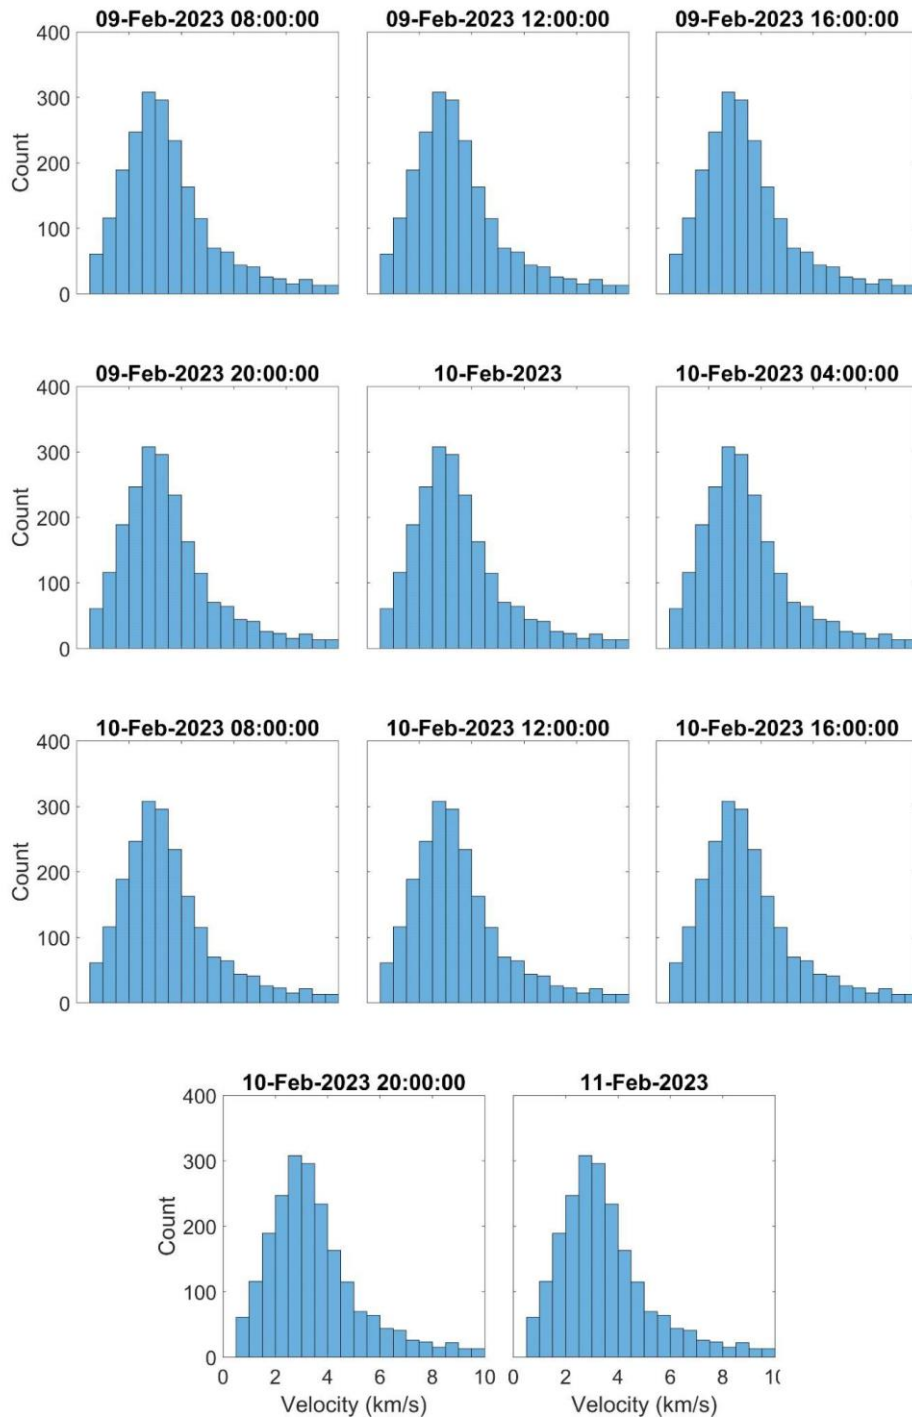

**Figure S10:** Distribution of apparent velocity values computed by f-k analysis for the PM frequency band. These values were calculated during the entire period when we obtained reliable locations by the grid search method.

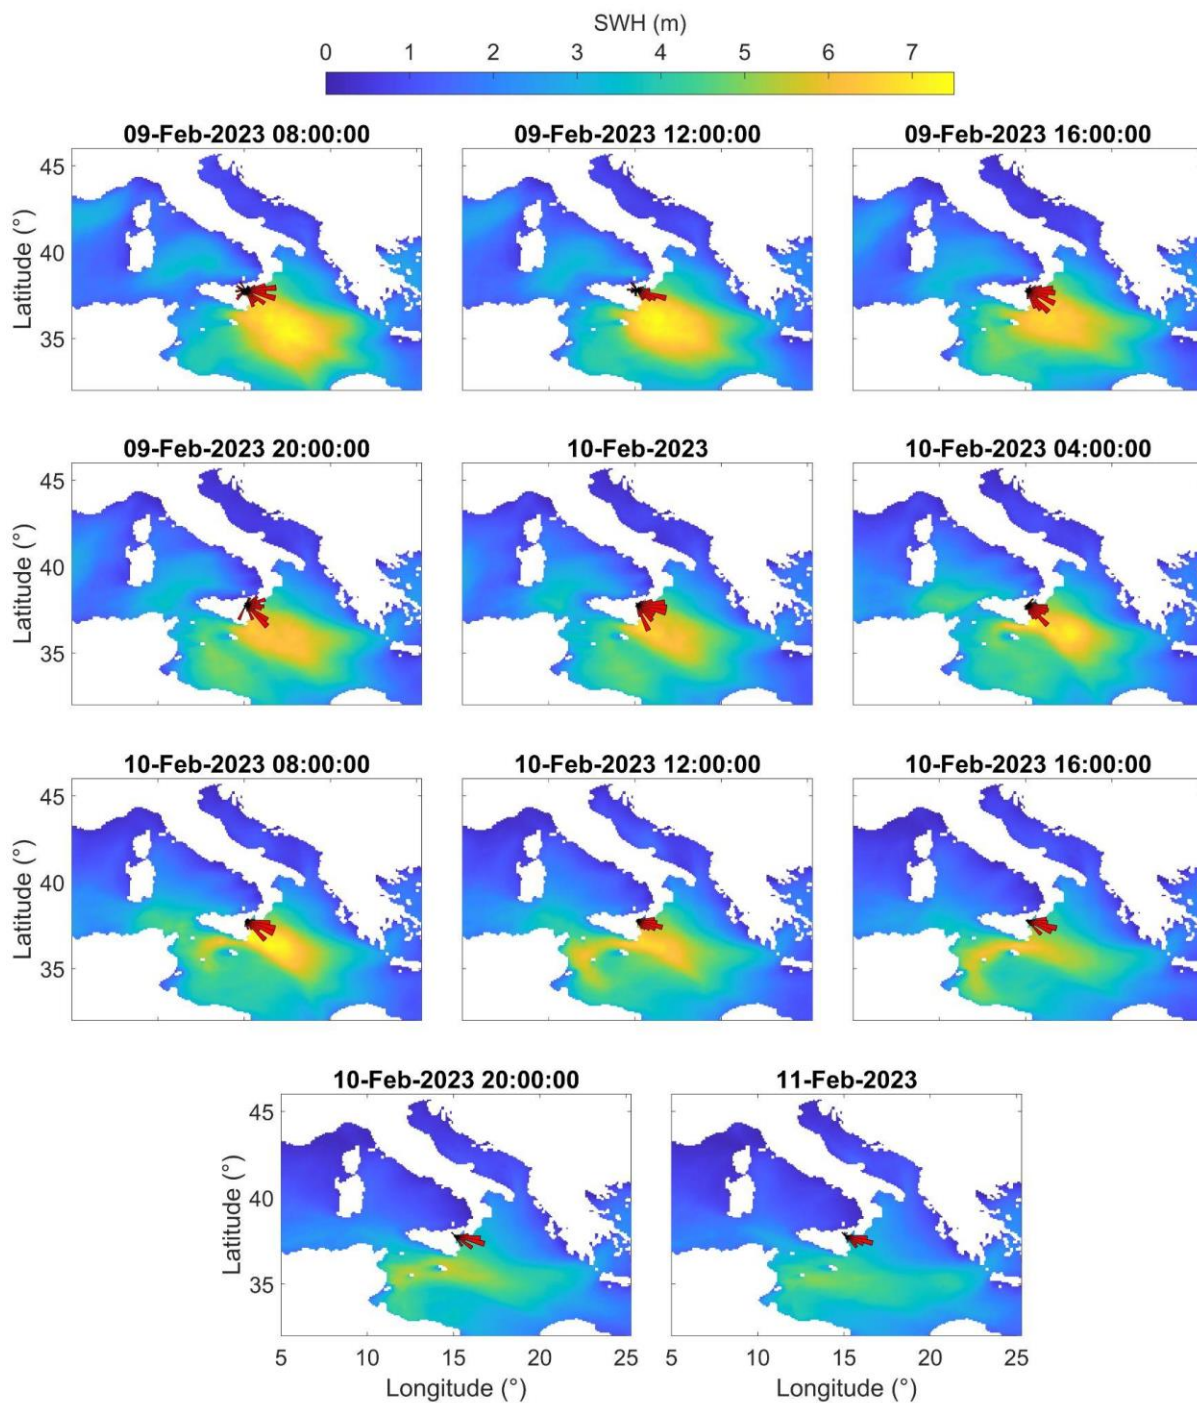

**Figure S11:** Hindcast maps showing the significant wave heights (in m) during the entire period when we obtained reliable locations by the grid search method. The rose diagram, located at the center of the Etna seismic permanent network (see **Figure 2b**), shows the distribution of the back azimuth values computed by f–k analysis for the SM frequency band.

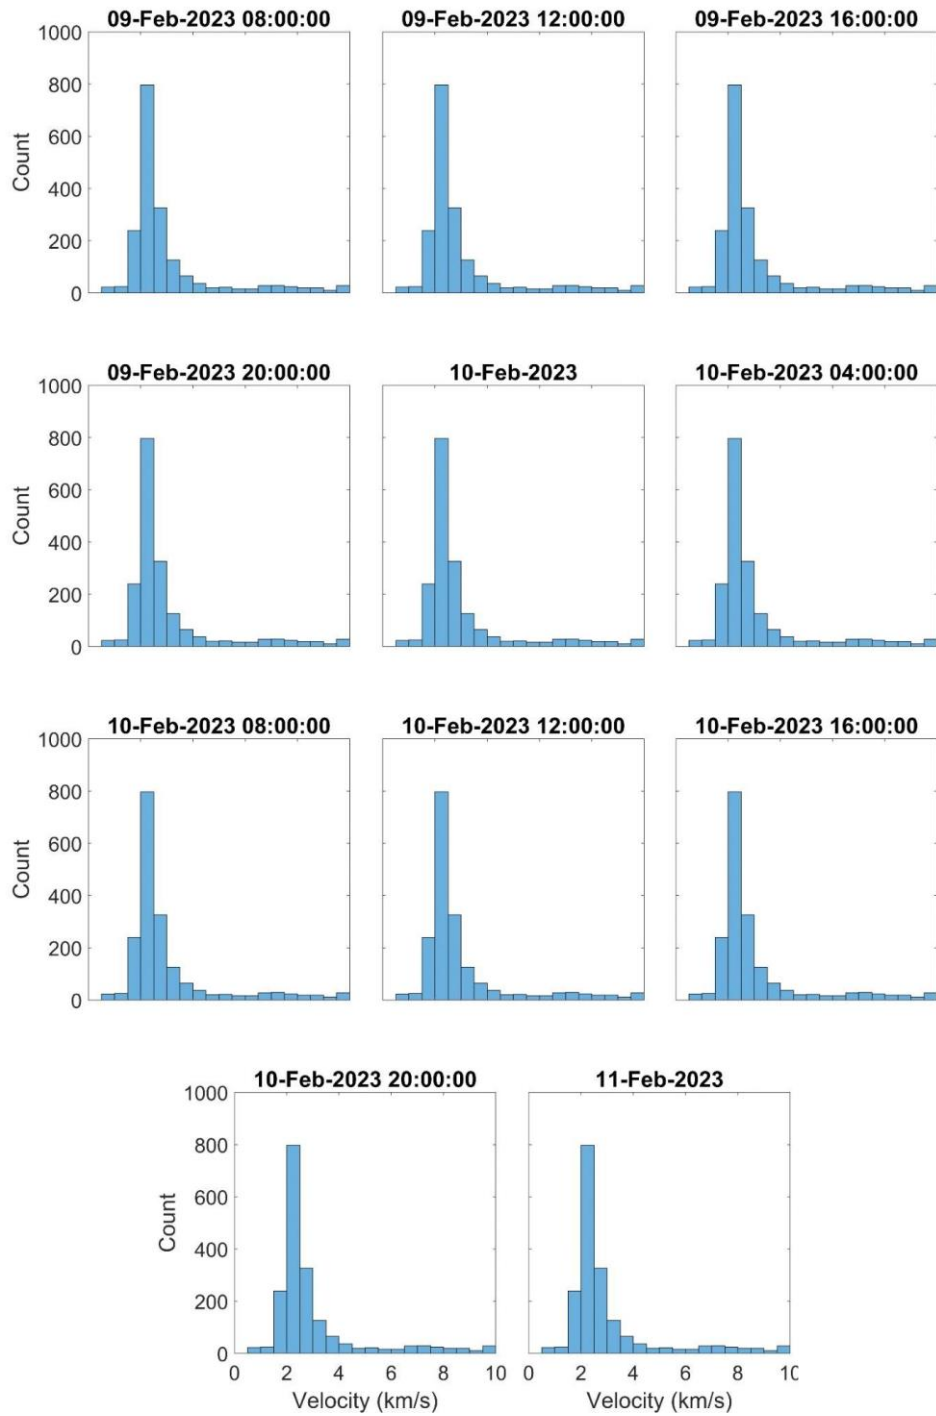

**Figure S12:** Distribution of apparent velocity values computed by f-k analysis for the SM frequency band. These values were calculated during the entire period when we obtained reliable locations by the grid search method.

**Supplementary Tables**

| <b>N</b> | <b>Name</b> | <b>Latitude<br/>(degrees)</b> | <b>Longitude<br/>(degrees)</b> | <b>Altitude<br/>(m<br/>a.s.l.)</b> | <b>Sensor</b>                | <b>Network</b> |
|----------|-------------|-------------------------------|--------------------------------|------------------------------------|------------------------------|----------------|
| 1        | QLNO        | 44.32                         | 8.34                           | 547                                | NANOMETRICS<br>TRILLIUM-40S  | IV             |
| 2        | MSSA        | 44.31                         | 9.51                           | 93                                 | NANOMETRICS<br>TRILLIUM-40S  | IV             |
| 3        | PLMA        | 44.05                         | 9.85                           | 22                                 | NANOMETRICS<br>TRILLIUM-240S | IV             |
| 4        | CELB        | 42.74                         | 10.21                          | 742                                | NANOMETRICS<br>TRILLIUM-40S  | IV             |
| 5        | CASP        | 42.79                         | 10.86                          | 390                                | NANOMETRICS<br>TRILLIUM-40S  | IV             |
| 6        | LATE        | 42.61                         | 11.80                          | 610                                | NANOMETRICS<br>TRILLIUM-40S  | IV             |
| 7        | TOLF        | 42.06                         | 12.00                          | 371                                | NANOMETRICS<br>TRILLIUM-40S  | IV             |
| 8        | LAV9        | 41.68                         | 12.69                          | 300                                | NANOMETRICS<br>TRILLIUM-40S  | IV             |
| 9        | GIUL        | 41.56                         | 13.25                          | 566                                | NANOMETRICS<br>TRILLIUM-40S  | IV             |
| 10       | MODR        | 41.14                         | 13.87                          | 345                                | NANOMETRICS<br>TRILLIUM-40S  | IV             |
| 11       | IFOR        | 40.71                         | 13.85                          | 170                                | GURALP CMG-<br>40T-60S       | IV             |
| 12       | IMTC        | 40.72                         | 13.87                          | 59                                 | GURALP CMG-<br>40T-60S       | IV             |
| 13       | IOCA        | 40.74                         | 13.90                          | 123                                | GURALP CMG-<br>40T-60S       | IV             |
| 14       | CFMN        | 40.83                         | 14.09                          | 59                                 | GURALP CMG-<br>3ESPC-120S    | IV             |

|    |      |       |       |      |                           |    |
|----|------|-------|-------|------|---------------------------|----|
| 15 | CPOZ | 40.82 | 14.11 | 2    | GURALP CMG-40T-60S        | IV |
| 16 | COLB | 40.82 | 14.14 | 22   | GURALP CMG-40T-60S        | IV |
| 17 | VTIR | 40.80 | 14.42 | 612  | GURALP CMG-40T-60S        | IV |
| 18 | MCRV | 40.78 | 15.16 | 1191 | NANOMETRICS TRILLIUM-40S  | IV |
| 19 | CDRU | 40.49 | 15.30 | 1057 | NANOMETRICS TRILLIUM-40S  | IV |
| 20 | CMPR | 40.32 | 15.30 | 732  | NANOMETRICS TRILLIUM-40S  | IV |
| 21 | BULG | 40.08 | 15.37 | 815  | NANOMETRICS TRILLIUM-40S  | IV |
| 22 | CET2 | 39.53 | 15.95 | 675  | NANOMETRICS TRILLIUM-40S  | IV |
| 23 | CAR1 | 39.25 | 16.21 | 680  | NANOMETRICS TRILLIUM-40S  | IV |
| 24 | JOPP | 38.60 | 15.88 | 500  | NANOMETRICS TRILLIUM-40S  | IV |
| 25 | MTTG | 38.00 | 15.69 | 484  | NANOMETRICS TRILLIUM-40S  | IV |
| 26 | IST3 | 38.79 | 15.23 | 255  | NANOMETRICS TRILLIUM-40S  | IV |
| 27 | ISTR | 38.78 | 15.19 | 103  | NANOMETRICS TRILLIUM-40S  | IV |
| 28 | IACL | 38.53 | 14.35 | 145  | NANOMETRICS TRILLIUM-40S  | IV |
| 29 | IFIL | 38.56 | 14.57 | 277  | NANOMETRICS TRILLIUM-40S  | IV |
| 30 | ILOS | 38.44 | 14.94 | 283  | NANOMETRICS TRILLIUM-40S  | IV |
| 31 | IVPL | 38.37 | 14.98 | 486  | NANOMETRICS TRILLIUM-40S  | IV |
| 32 | PII  | 43.72 | 10.52 | 66   | NANOMETRICS TRILLIUM-120S | IV |
| 33 | MMN  | 39.89 | 15.99 | 921  | NANOMETRICS               | IV |

|    |      |       |       |      |                              |    |
|----|------|-------|-------|------|------------------------------|----|
|    |      |       |       |      | TRILLIUM-40S                 |    |
| 34 | TDS  | 39.66 | 16.33 | 244  | NANOMETRICS<br>TRILLIUM-120C | IV |
| 35 | DGI  | 40.31 | 9.606 | 354  | NANOMETRICS<br>TRILLIUM-40S  | IV |
| 36 | SSY  | 37.15 | 15.07 | 600  | NANOMETRICS<br>TRILLIUM-40S  | IV |
| 37 | MPG  | 38.16 | 13.36 | 600  | LENNARTZ LE3D-<br>20S        | IV |
| 38 | GIB  | 37.99 | 14.02 | 1020 | NANOMETRICS<br>TRILLIUM-120S | IV |
| 39 | PLAC | 38.44 | 16.43 | 602  | NANOMETRICS<br>TRILLIUM-40S  | IV |
| 40 | SALB | 39.87 | 16.34 | 1000 | NANOMETRICS<br>TRILLIUM-40S  | IV |
| 41 | MESG | 40.58 | 17.85 | 78   | NANOMETRICS<br>TRILLIUM-40S  | IV |
| 42 | NOCI | 40.78 | 17.06 | 420  | NANOMETRICS<br>TRILLIUM-40S  | IV |
| 43 | AMUR | 40.90 | 16.60 | 443  | NANOMETRICS<br>TRILLIUM-40S  | IV |
| 44 | MRVN | 41.06 | 16.19 | 610  | NANOMETRICS<br>TRILLIUM-40S  | IV |
| 45 | CAPA | 41.15 | 15.81 | 156  | NANOMETRICS<br>TRILLIUM-120C | IV |
| 46 | MSAG | 41.71 | 15.90 | 890  | NANOMETRICS<br>TRILLIUM-40S  | IV |
| 47 | APRC | 41.75 | 15.54 | 672  | NANOMETRICS<br>TRILLIUM-120C | IV |
| 48 | FRES | 41.97 | 14.66 | 414  | NANOMETRICS<br>TRILLIUM-40S  | IV |
| 49 | TERO | 42.62 | 13.60 | 673  | NANOMETRICS<br>TRILLIUM-40S  | IV |
| 50 | TRTR | 42.80 | 13.91 | 160  | NANOMETRICS<br>TRILLIUM-40S  | IV |
| 51 | GUMA | 43.06 | 13.33 | 574  | NANOMETRICS<br>TRILLIUM-120S | IV |



|    |      |       |       |      |                           |    |
|----|------|-------|-------|------|---------------------------|----|
| 52 | AOI  | 43.55 | 13.60 | 530  | NANOMETRICS TRILLIUM-40S  | IV |
| 53 | PESA | 43.94 | 12.84 | 221  | NANOMETRICS TRILLIUM-40S  | IV |
| 54 | BRIS | 44.22 | 11.76 | 260  | NANOMETRICS TRILLIUM-120S | IV |
| 55 | CAVE | 44.86 | 11.00 | 18   | NANOMETRICS TRILLIUM-120S | IV |
| 56 | TEOL | 45.36 | 11.67 | 370  | NANOMETRICS TRILLIUM-120S | IV |
| 57 | STAL | 46.26 | 12.71 | 625  | NANOMETRICS TRILLIUM-120S | IV |
| 58 | OPPE | 45.30 | 11.17 | 20   | NANOMETRICS TRILLIUM-40S  | IV |
| 59 | PTCC | 46.40 | 13.35 | 700  | NANOMETRICS TRILLIUM-40S  | IV |
| 60 | AGLI | 41.12 | 9.173 | 180  | NANOMETRICS TRILLIUM-40S  | IV |
| 61 | CAVT | 37.67 | 12.75 | 158  | GURALP CMG-3EX            | IV |
| 62 | MMGO | 37.66 | 12.97 | 397  | NANOMETRICS TRILLIUM-120C | IV |
| 63 | CLTA | 37.15 | 13.96 | 246  | NANOMETRICS TRILLIUM-40S  | IV |
| 64 | HPAC | 36.70 | 15.03 | 70   | NANOMETRICS TRILLIUM-40S  | IV |
| 65 | HAGA | 37.28 | 15.15 | 126  | NANOMETRICS TRILLIUM-40S  | IV |
| 66 | EPOZ | 37.67 | 15.18 | 124  | GURALP CMG-3EX            | IV |
| 67 | MBFT | 37.94 | 12.95 | 520  | NANOMETRICS TRILLIUM-120S | IV |
| 68 | CSLB | 37.93 | 14.05 | 583  | NANOMETRICS TRILLIUM-120S | IV |
| 69 | MUCR | 38.04 | 14.87 | 1042 | NANOMETRICS TRILLIUM-40S  | IV |
| 70 | MILZ | 38.27 | 15.23 | 0    | NANOMETRICS               | IV |

|    |      |       |       |     |                                                    |    |
|----|------|-------|-------|-----|----------------------------------------------------|----|
|    |      |       |       |     | TRILLIUM-40S                                       |    |
| 71 | MPNC | 38.14 | 15.35 | 479 | NANOMETRICS TRILLIUM-40S                           | IV |
| 72 | MSRU | 38.26 | 15.50 | 408 | NANOMETRICS TRILLIUM-40S                           | IV |
| 73 | AIO  | 37.97 | 15.23 | 751 | NANOMETRICS TRILLIUM-40S                           | IV |
| 74 | IMI  | 43.91 | 7.893 | 840 | NANOMETRICS TRILLIUM-40S                           | IV |
| 75 | RORO | 44.11 | 8.066 | 246 | NANOMETRICS TRILLIUM-40S                           | IV |
| 76 | AJAC | 41.93 | 8.76  | 27  | CMG3-ESPC broad band triaxial sensor by Guralp     | FR |
| 77 | CLAF | 43.13 | 3.09  | 115 | CMG3-ESP broad band triaxial sensor by Guralp      | FR |
| 78 | PYL  | 36.89 | 21.74 | 226 | Trillium 40, 40 s, 1553 V/m/s-Trident, 16 vpp      | HP |
| 79 | AMT  | 37.53 | 21.70 | 482 | Trillium 40, 40 s, 1553 V/m/s-Trident, 16 vpp      | HP |
| 80 | KNDR | 35.23 | 23.62 | 13  | CMG-3ESP, 120 s, 2000 V/m/s-RT130                  | HC |
| 81 | LTHK | 37.70 | 20.83 | 35  | CMG-3T, 120 s, 1500 V/m/s-Trident, 40 Vpp          | HP |
| 82 | KTHA | 36.25 | 23.06 | 360 | STS-2, 120 s, 1500 V/m/s, generation 3 electronics | HL |
| 83 | VLO  | 40.46 | 19.49 | 80  | NANOMETRICS TRILLIUM-40S                           | AC |
| 84 | PZIN | 36.81 | 11.97 | 205 | NANOMETRICS TRILLIUM-40S                           | IV |
| 85 | LPDG | 35.51 | 12.63 | 50  | NANOMETRICS TRILLIUM-40S                           | IV |
| 86 | ANKY | 35.86 | 23.30 | 143 | CMG-3ESP, 60 s,                                    | HL |

|     |       |       |       |     |                                             |    |
|-----|-------|-------|-------|-----|---------------------------------------------|----|
|     |       |       |       |     | 2000 V/m/s-PS6-24                           |    |
| 87  | KTHR  | 36.24 | 22.99 | 270 | CMG-3ESP, 120 s,<br>2000 V/m/s-DM-24<br>Mk3 | HC |
| 88  | GVD   | 34.83 | 24.08 | 170 | STS-2, 120 s, 1500<br>V/m/s                 | HL |
| 89  | PFKS  | 35.04 | 25.47 | 745 | CMG-3ESP, 120 s,<br>2000 V/m/s-RT130        | HC |
| 90  | TIR   | 41.34 | 19.86 | 247 | STRECKEISEN<br>STS-1H-VBB                   | MN |
| 91  | FSK   | 38.45 | 20.56 | 113 | CMG-3T, 120 s,<br>1500 V/m/s-DM-24<br>Mk2   | HP |
| 92  | IMOD  | 34.97 | 24.79 | 243 | CMG-3ESP, 120 s,<br>2000 V/m/s-RT130        | HC |
| 93  | ZKR   | 35.11 | 26.21 | 254 | STS-2, 120 s, 1500<br>V/m/s                 | HL |
| 94  | PGHD  | 36.77 | 12.04 | 331 | NANOMETRICS<br>TRILLIUM-40S                 | IV |
| 95  | HMDC  | 36.96 | 14.78 | 600 | NANOMETRICS<br>TRILLIUM-40S                 | IV |
| 96  | HVIT  | 36.99 | 14.52 | 296 | GURALP CMG-<br>3EX                          | IV |
| 97  | SRN   | 39.88 | 20.00 | 20  | NANOMETRICS<br>TRILLIUM-40S                 | AC |
| 99  | WDD   | 35.83 | 14.52 | 15  | STRECKEISEN<br>STS-2-120S                   | MN |
| 100 | LINA  | 35.86 | 12.86 | 70  | NANOMETRICS<br>TRILLIUM-40S                 | IV |
| 101 | MSDA  | 35.90 | 14.48 | 48  | NANOMETRICS<br>TRILLIUM-120S                | ML |
| 102 | XLND  | 36.03 | 14.22 | 6   | NANOMETRICS<br>TRILLIUM-120S                | ML |
| 103 | IWAV5 | 36.72 | 14.83 | 18  | CERTIMUS -<br>GURALP                        |    |
| 104 | IWAV3 | 36.87 | 14.44 | 47  | CERTIMUS -<br>GURALP                        |    |

|     |       |       |       |     |                   |  |
|-----|-------|-------|-------|-----|-------------------|--|
| 105 | IWAV2 | 36.92 | 14.68 | 607 | CERTIMUS - GURALP |  |
|-----|-------|-------|-------|-----|-------------------|--|

**Table S1.** List of stations used for the spectral analysis and in the grid search method and their features in terms of locations and sensor type.

| <b>N</b> | <b>Name</b> | <b>Longitude<br/>(degrees)</b> | <b>Latitude<br/>(degrees)</b> | <b>Altitude<br/>(m a.s.l.)</b> | <b>Sensor</b>            |
|----------|-------------|--------------------------------|-------------------------------|--------------------------------|--------------------------|
| 1        | EPLC        | 14.9857                        | 37.7651                       | 2917                           | Nanometrics Trillium 40S |
| 2        | ESVO        | 14.9469                        | 37.7731                       | 1691                           | Nanometrics Trillium 40S |
| 3        | ESPC        | 15.0274                        | 37.6925                       | 1610                           | Nanometrics Trillium 40S |
| 4        | ESLN        | 14.9744                        | 37.6934                       | 1735                           | Nanometrics Trillium 40S |
| 5        | EPIT        | 15.0567                        | 37.8113                       | 1586                           | Nanometrics Trillium 40S |

|    |      |         |         |      |                          |
|----|------|---------|---------|------|--------------------------|
| 6  | EPDN | 15.0168 | 37.7659 | 2823 | Nanometrics Trillium 40S |
| 7  | EMPL | 14.9703 | 37.6790 | 1438 | Nanometrics Trillium 40S |
| 8  | EMFO | 15.0902 | 37.7357 | 1163 | Nanometrics Trillium 40S |
| 9  | ECZM | 14.9041 | 37.7313 | 1346 | Nanometrics Trillium 40S |
| 10 | ECPN | 14.9865 | 37.7437 | 2996 | Nanometrics Trillium 40S |
| 11 | ECNE | 15.0018 | 37.7653 | 2901 | Nanometrics Trillium 40S |
| 12 | ECBD | 15.0865 | 37.7802 | 1419 | Nanometrics Trillium 40S |
| 13 | EMNR | 15.0260 | 37.8168 | 1797 | Nanometrics Trillium 40S |
| 14 | EMSG | 14.9495 | 37.8215 | 1435 | Nanometrics Trillium 40S |
| 15 | EMFS | 14.9979 | 37.7196 | 2507 | Nanometrics Trillium 40S |

**Table S2.** List of stations used in the array method and their features in terms of locations and sensor type.
